# Supplementary material for: New poly-imidazolium–triazole particles by CuAAC cross-linking of calix[4]arene bis-azide/alkyne amphiphiles – a prospective support for Pd in the Mizoroki–Heck reaction
Source: Royal Society of Chemistry journal article supplement (doi:10.1039/d0ra09740c), 2020-12-24
Supplement: d0ra09740c1.pdf [file d0ra09740c1.pdf]

## SUPPORTING INFORMATION

### **New poly-imidazolium-triazole particles by CuAAC cross-linking of calix[4]arene bis-azide/alkyne amphiphiles - a perspective support for Pd in Mizoroki–Heck reaction**

Vladimir Burilov,<sup>†,a</sup> Ramilya Garipova,<sup>a</sup> Diana Mironova,<sup>a</sup> Elza Sultanova,<sup>a</sup> Ilshat Bogdanov,<sup>a</sup> Eugeny Ocherednyuk,<sup>a</sup> Vladimir Evtugyn,<sup>c</sup> Yuri Osin,<sup>c</sup> Ildar Rizvanov,<sup>b</sup> Svetlana Solovieva<sup>b</sup> and Igor Antipin<sup>a</sup>

*a Kazan Federal University, 18 Kremlevskaya st. Kazan, 420008, Russian Federation.*

*b Arbuzov Institute of Organic and Physical Chemistry, FRC Kazan Scientific Center of RAS, 8 Arbuzov str., Kazan, 420088, Russian Federation.*

*c Interdisciplinary Centre for Analytical Microscopy Kazan Federal University, 18 Kremlevskaya st. Kazan, 420008, Russian Federation.*

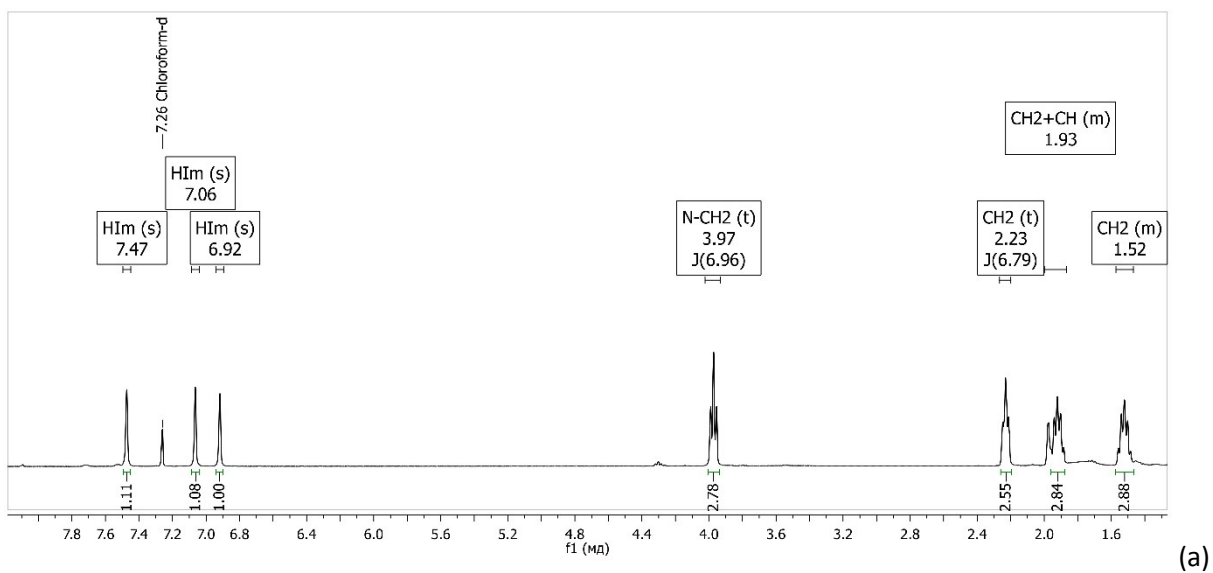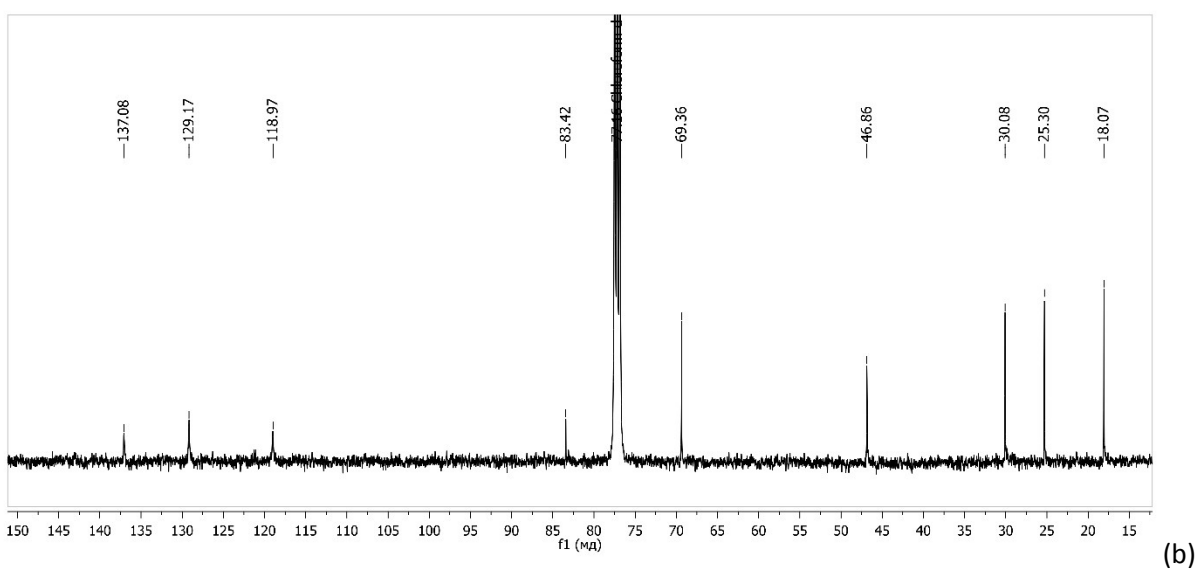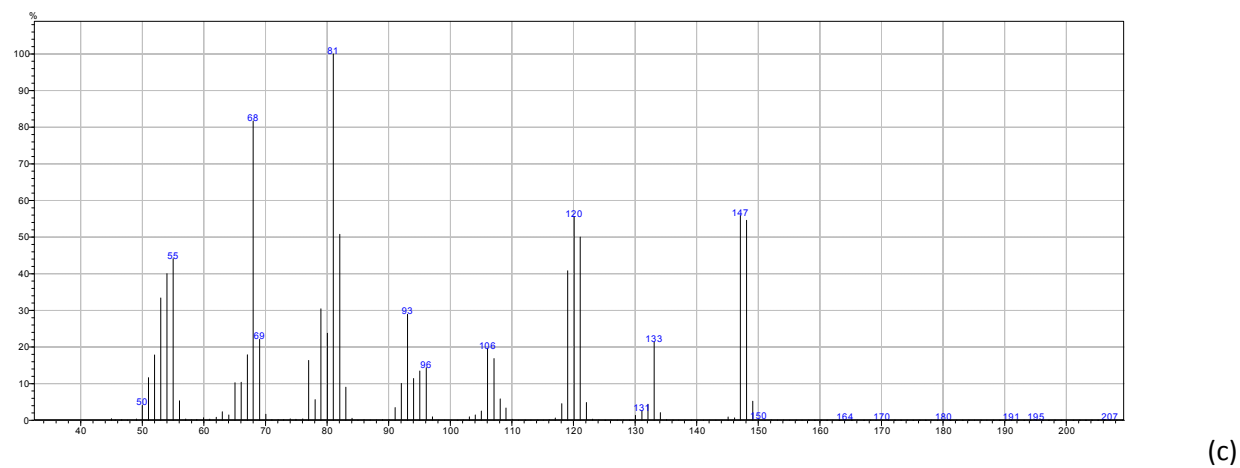

Figure S1. NMR  $^1\text{H}$  (a),  $^{13}\text{C}$  (b) and EI (c) spectra of *1-(hex-5-yn-1-yl)-1H-imidazole*.

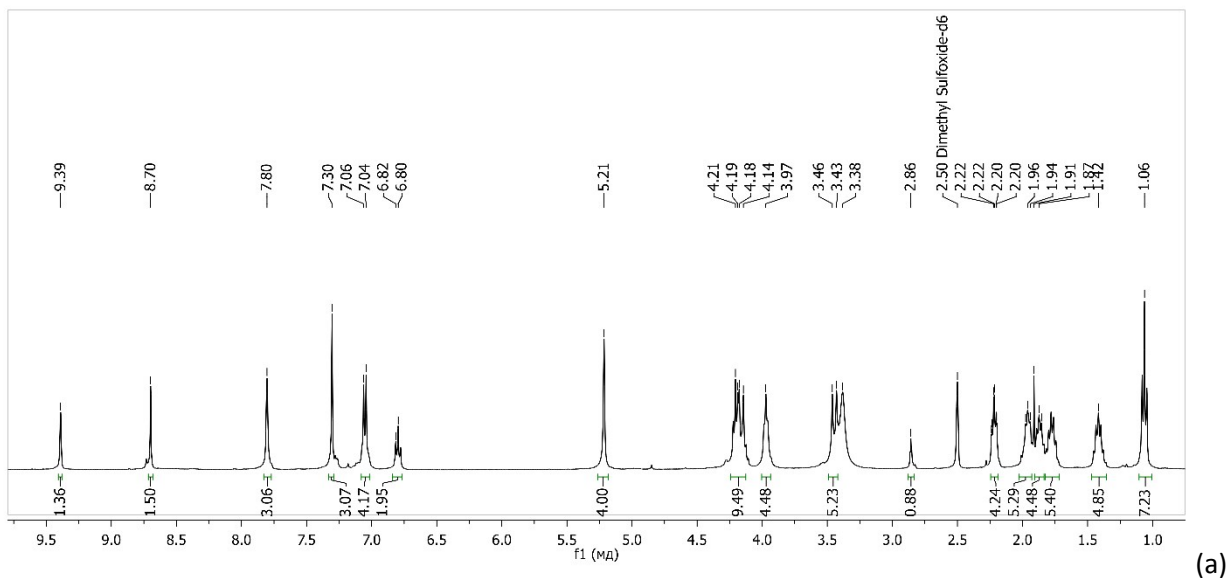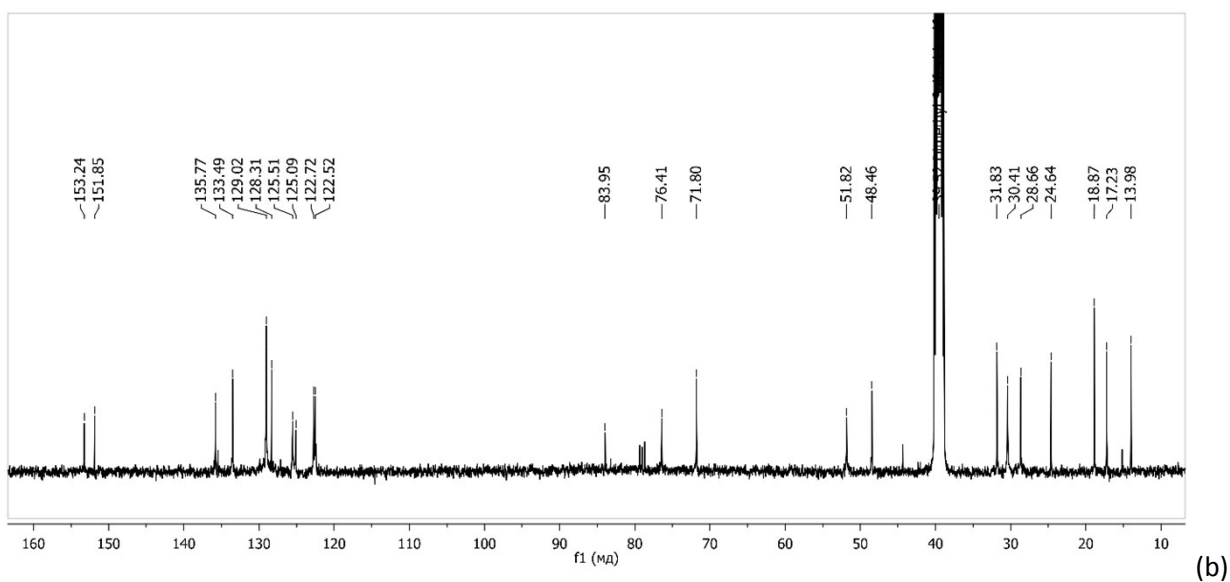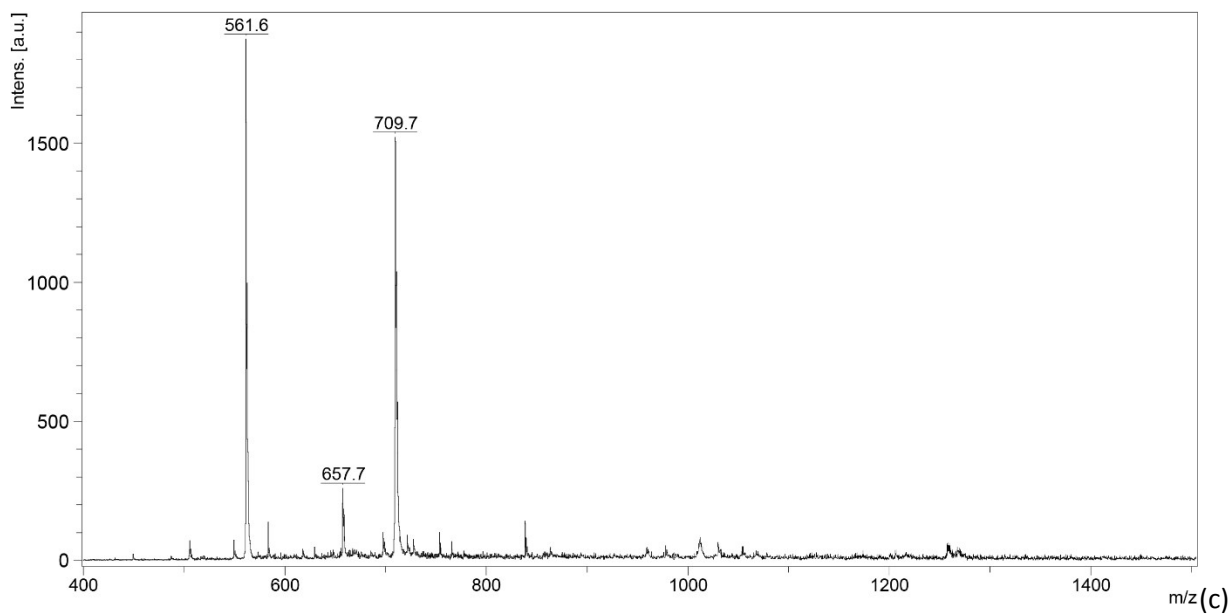

Figure S2. NMR  $^1\text{H}$  (a),  $^{13}\text{C}$  (b) and MALDI-TOF (c) spectra of *11,23-Bis[3(1-(hex-5-yn-1-yl)-1H-imidazolium]-25,27-dihydroxy-26,28-dibutoxycalix[4]arene dichloride 4*.

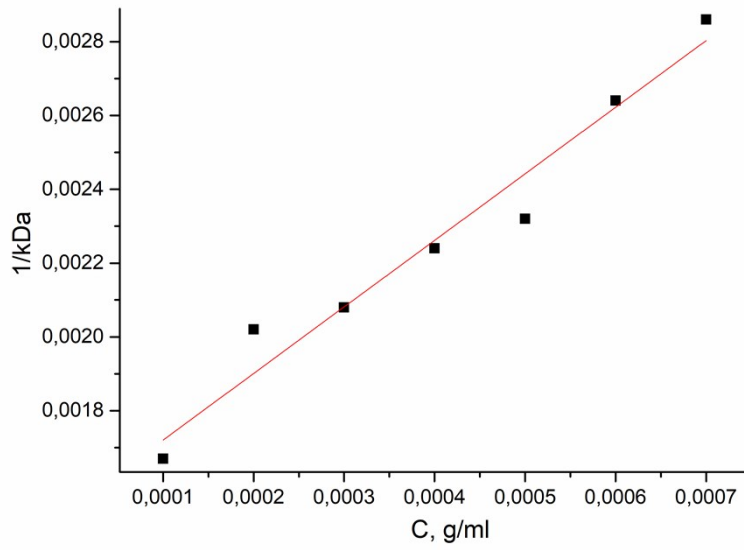

(a)

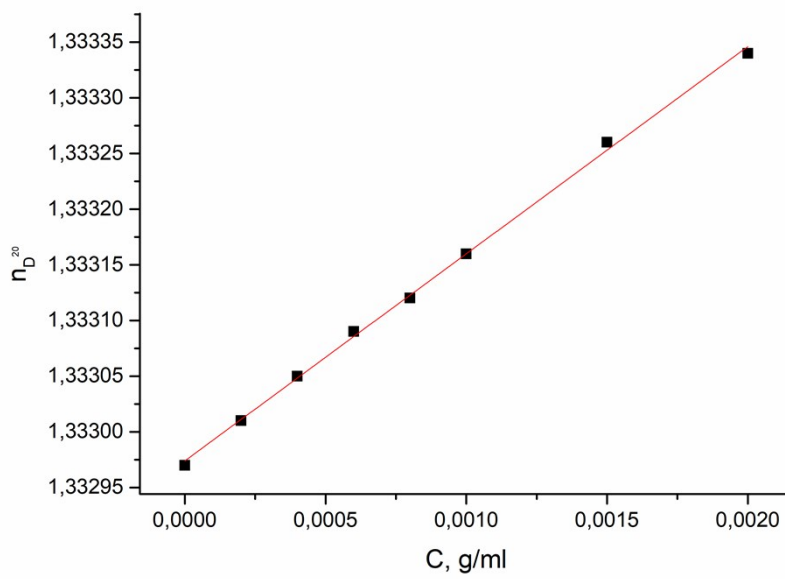

(b)

Figure S3. Debye plot for polymer in H<sub>2</sub>O,  $C = 0.1 \div 0.7$  mg/ml (a) and refractive index increments,  $dn/dc$ , at 20°C,  $C = 0.1 \div 2$  mg/ml (b).

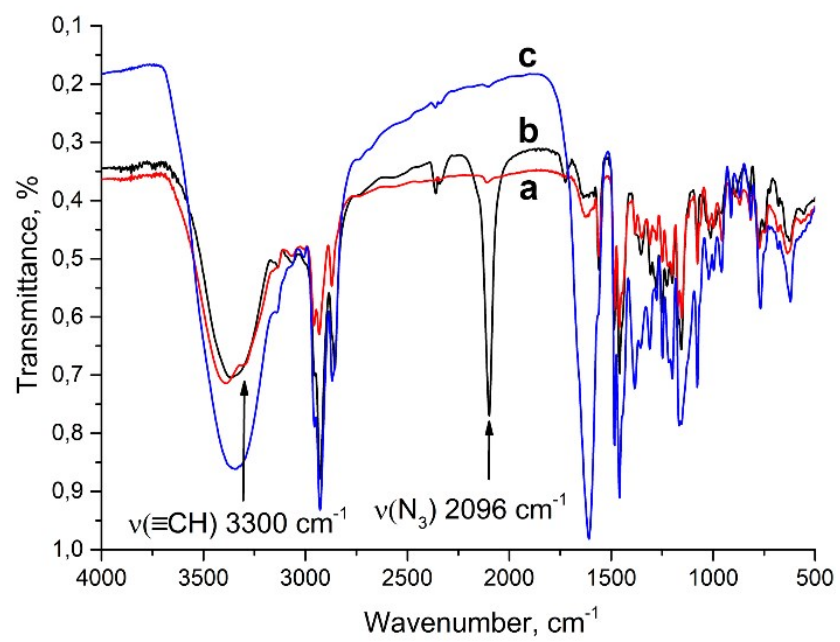

Figure S4. IR spectra (KBr pellets) of **4**(a), **5**(b) and mixture of **4** and **5** after cross-linkage.
